# Supplementary material for: Quality Control of Vitamins A and E and Coenzyme Q10 in Commercial Anti-Ageing Cosmetic Products
Source: MDPI journal article supplement (doi:10.3390/cosmetics8030061), 2021-06-25
Supplement: s1 [file s1]

## **Supplementary Materials**

### **Journal name**

Cosmetics

### **Special Issue**

Analytical Methods for Quality Control of Cosmetics

### **Article title**

Quality control of vitamins A and E, and coenzyme Q10 in commercial anti-age cosmetic products

### **Authors**

Žane Temova Rakuša, Robert Roškar\*

University of Ljubljana, Faculty of Pharmacy, Aškerčeva cesta 7, 1000 Ljubljana, Slovenia

**Tel:** +386 1 4769 500, **e-mail:** robert.roskar@ffa.uni-lj.si

### **Contents**

1. Figure S1 (*Page 2*)
2. Figure S2 (*Page 2*)
3. Figure S3 (*Page 3*)
4. Figure S4 (*Page 3*)
5. Figure S5 (*Page 4*)
6. Figure S6 (*Page 4*)
7. Figure S7 (*Page 5*)

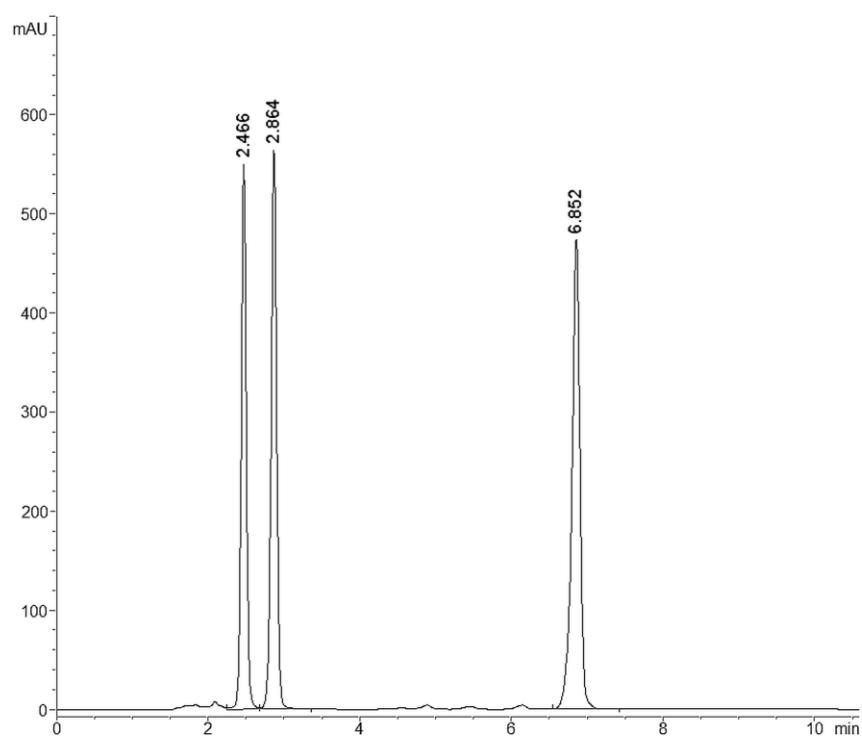

Figure S1. Representative chromatogram of a standard mixture of retinol (retention time 2.5 min), retinyl acetate (retention time 2.9 min), and retinyl palmitate (retention time 6.9 min) at detection wavelength 325 nm.

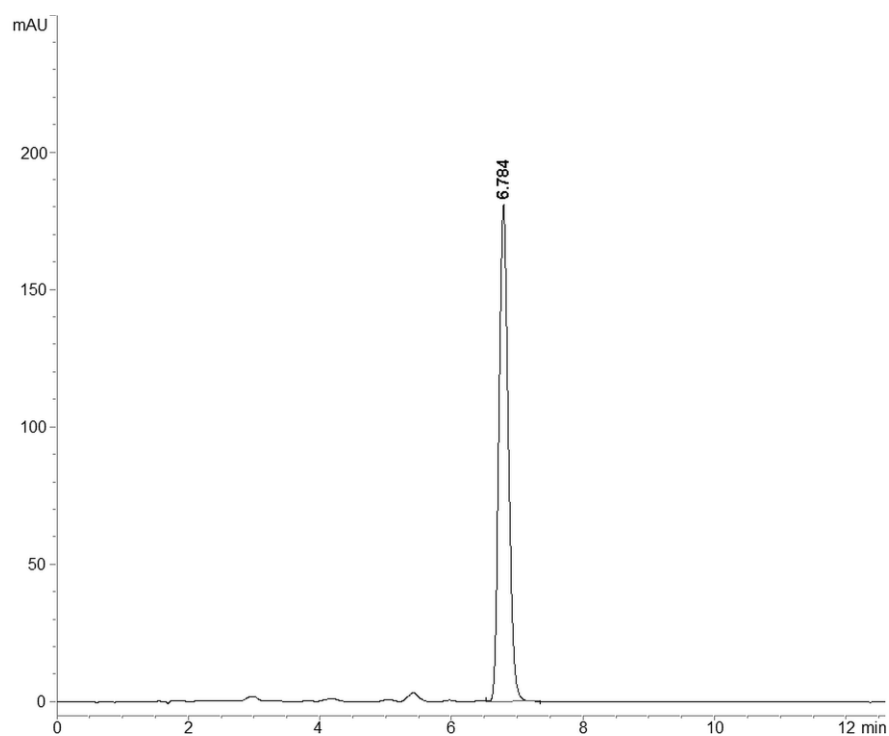

Figure S2. Representative chromatogram of  $\beta$  carotene standard solution (retention time 6.8 min) at detection wavelength 450 nm.

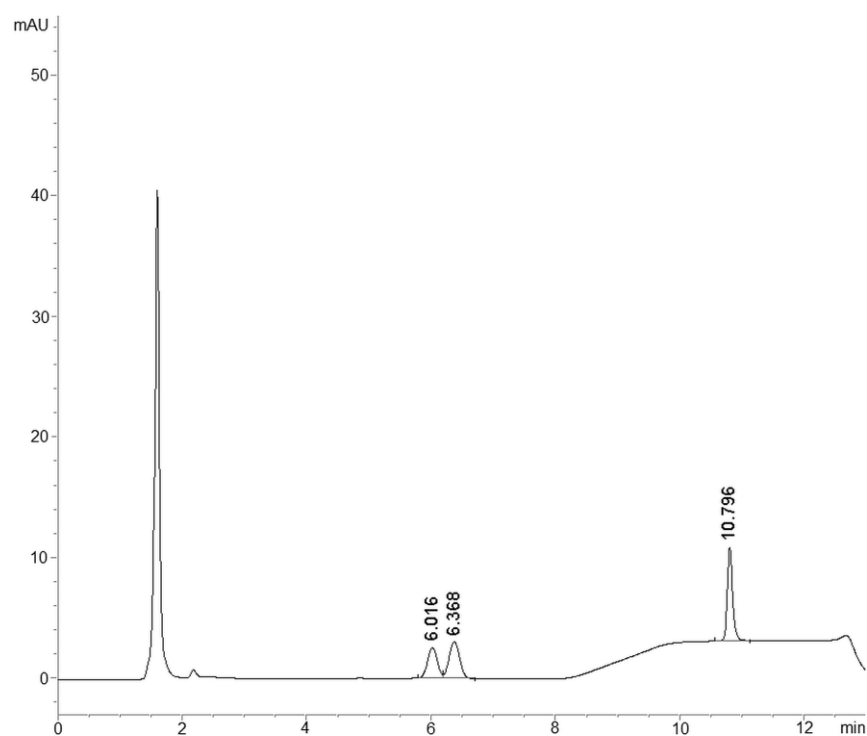

Figure S3. Representative chromatograms of a standard mixture of tocopherol (retention time 6.0 min), tocopheryl acetate (retention time 6.4), and coenzyme Q10 (ubiquinone) (retention time 10.8) at detection wavelength 280 nm.

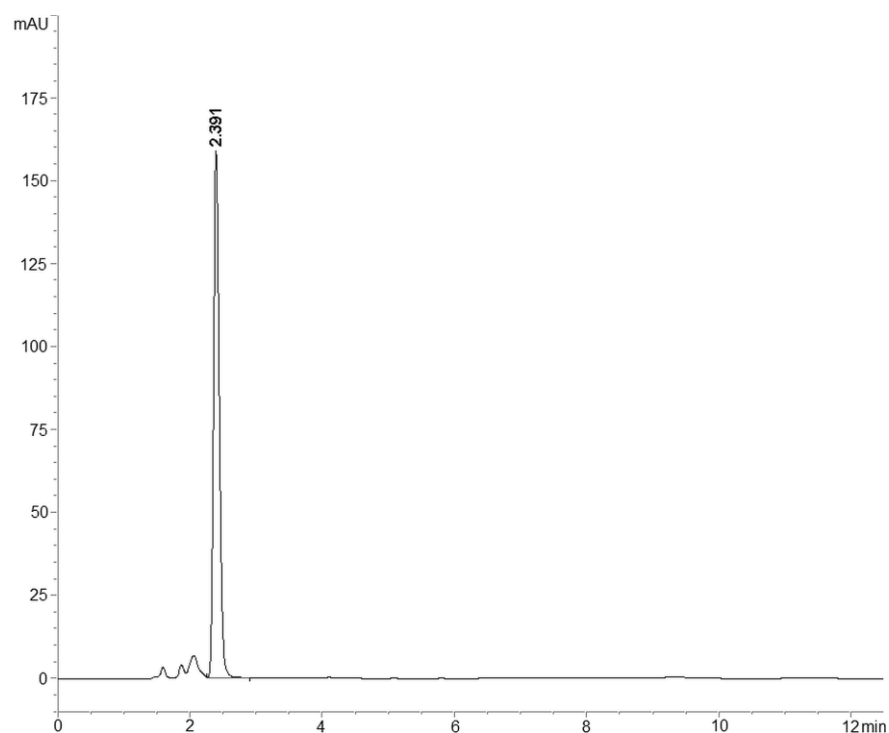

Figure S4. Representative chromatograms of a cosmetic product with retinol (retention time 2.4) at detection wavelength 325 nm.

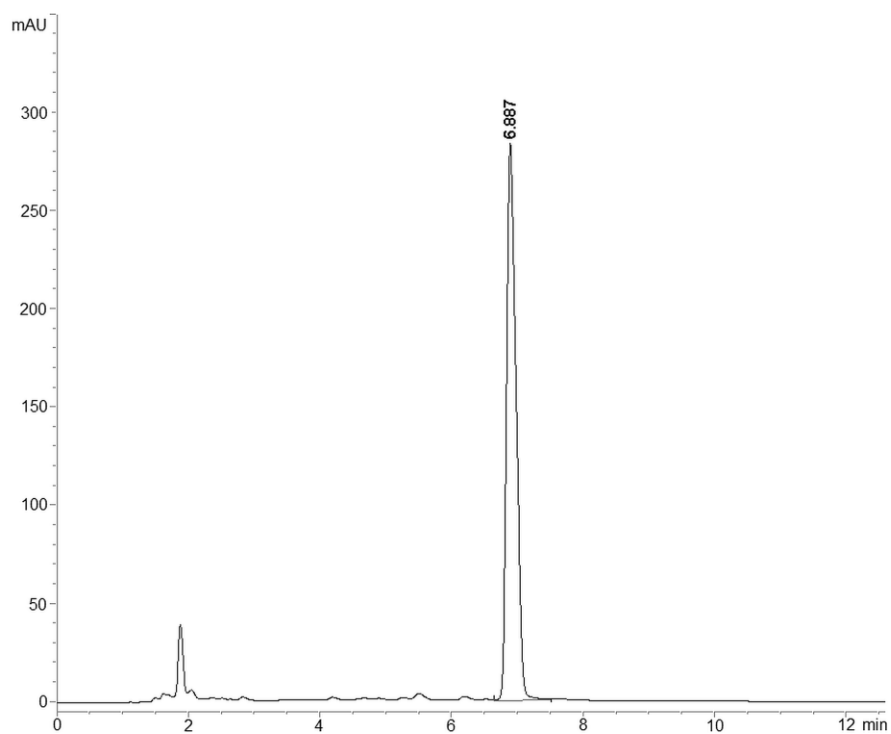

Figure S5. Representative chromatograms of a cosmetic product with retinyl palmitate (retention time 6.9) at detection wavelength 325 nm.

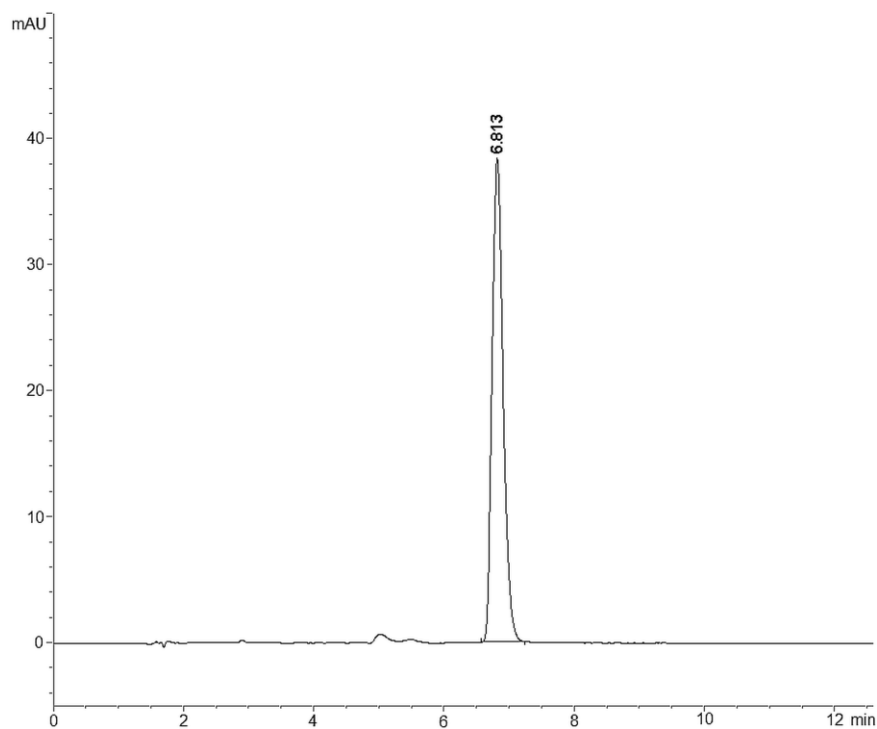

Figure S6. Representative chromatograms of a cosmetic product with  $\beta$  carotene (retention time 6.8) at detection wavelength 450 nm.

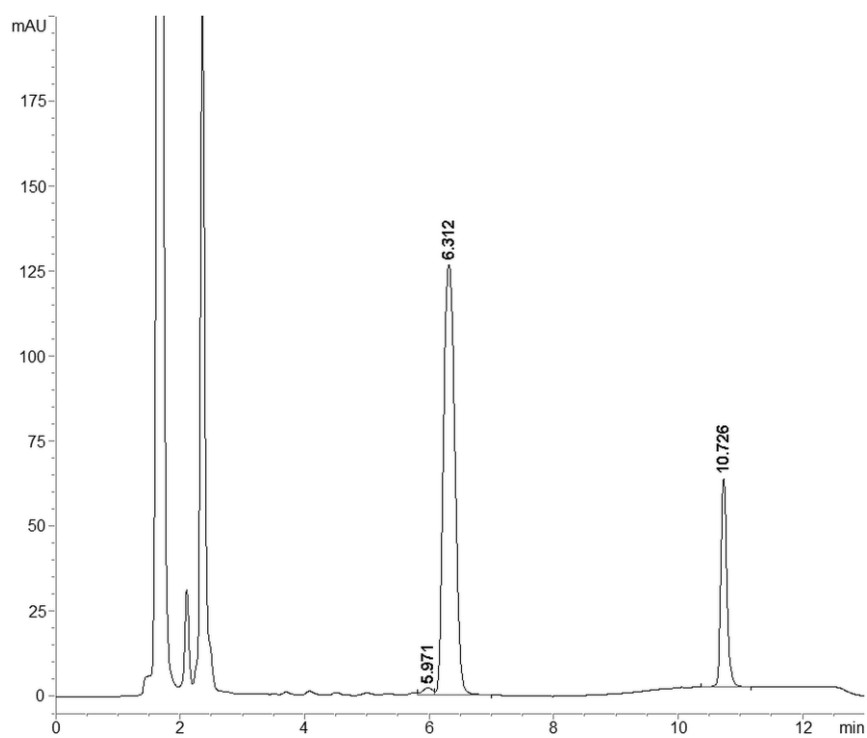

Figure S7. Representative chromatograms of a cosmetic product with tocopherol (retention time 6.0 min), tocopheryl acetate (retention time 6.3), and coenzyme Q10 (ubiquinone) (retention time 10.7) at detection wavelength 280 nm.
